# Supplementary material
Source: ML conference proceedings conference paper supplement (https://openreview.net/forum?id=EBYZSRRzSE)
Supplement: supplementary_material [file attachment]

## 551 A License

552 The YouTube-News-Timeline dataset is under the CC BY 4.0 International license. Please refer to  
553 <https://creativecommons.org/licenses/by/4.0/legalcode> for license details.

## 554 B Data Format Example

555 A data format example is shown below.

Listing 1: A data example

```
556
557 1 {"https://apnews.com/article/japan-accidents-tsunamis-earthquakes-42
558   ↪d4947609becd7f141e9524a8c98937": # The URL link of the webpage
559   ↪where we crawl the timeline.
560 2   [
561 3     [
562 4       "0hEbGK4PnZg",
563 5       "cl19tfn33hI",
564 6       "R016z0HaUAM",
565 7       "5QhCsR-t-qM",
566 8       "ev3FBIOHMX8"
567 9     ],
568 10    [
569 11      "psAuFr8Xeqs",
570 12      "BsRd7WQuBHc",
571 13      "Dp_8rLL1Y18",
572 14      "h1m7GFPAq3o"
573 15    ],
574 16    [
575 17      "f4TaKPKe1gg",
576 18      "DLlsKd-QC2o"
577 19    ],
578 20    [
579 21      "ocluW1Vhvcg",
580 22      "vusthiUFx_0",
581 23      "vGHzuZQLYtg",
582 24      "7XpLbhQxpLw",
583 25      "UsPFUzXisq4"
584 26    ],
585 27    [
586 28      "hA3fNK0rxcs"
587 29    ]
588 30  ] # The URL links of the retrieved YouTube news videos. Each list
589   ↪in the nested list corresponds to one node on the timeline.
590   ↪These nodes are ordered in the nested list.
591 31 }
592
```

## 593 C More Dataset Characteristics

594 We include more details on the dataset's characteristics here. As demonstrated in Figure 8, the  
595 reference timelines are curated from a diverse set of more than 1,000 publishers. The primary topics,  
596 each recurring more than 30 times, are depicted in In Figure 9. The topic annotations are given  
597 by an in-house proprietary entity linking algorithm. Moreover, the distribution of the event date,  
598 corresponding to each node on timelines, is shown in Figure 10.

## 599 D More Experimental Studies

600 To assess the impact of video duration on our model's performance, in Figure 11, we present a  
601 correlation between the video length and the corresponding video-level Euclidean distance, based

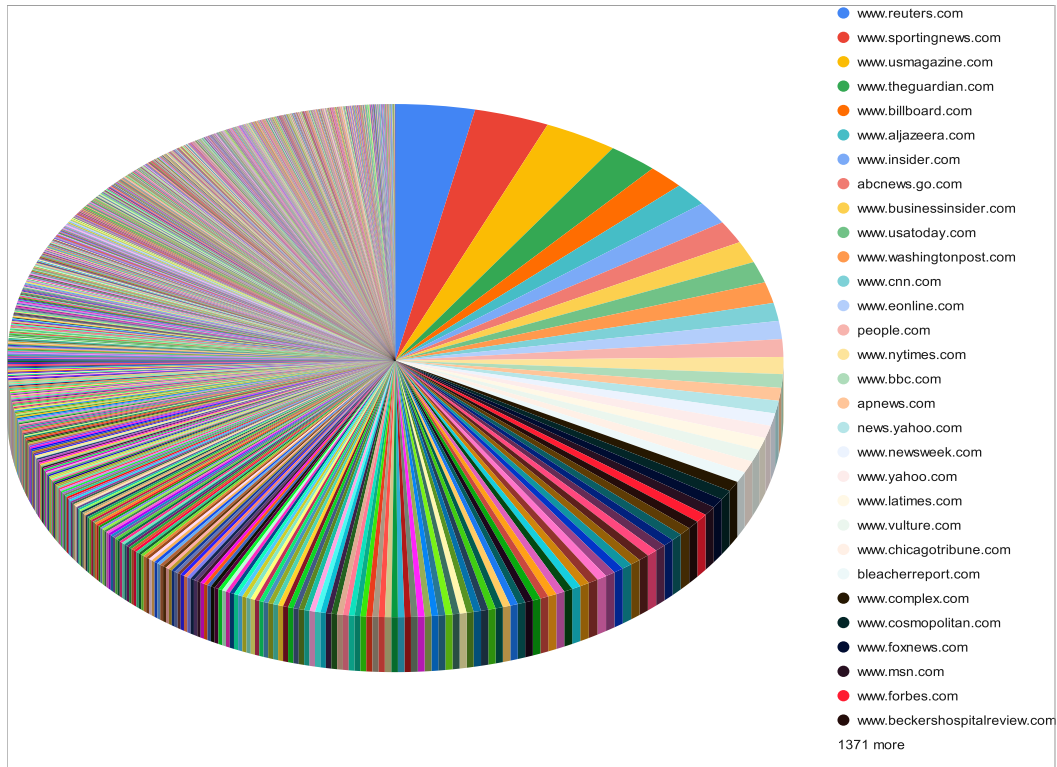

Figure 8: Pei chart of the news publishers.

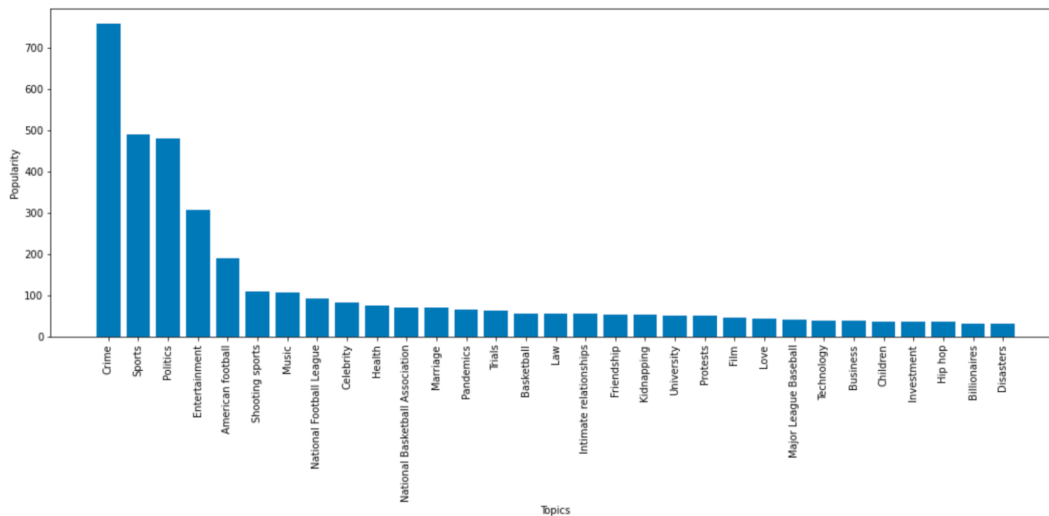

Figure 9: Distribution of the covered main topics.

602 on our Tri-Transformer model over the test set. The video-level Euclidean distance is not sensitive  
 603 to video length. It can be observed that the variance becomes large for longer videos as the longer  
 604 videos are less in both the training and test sets.

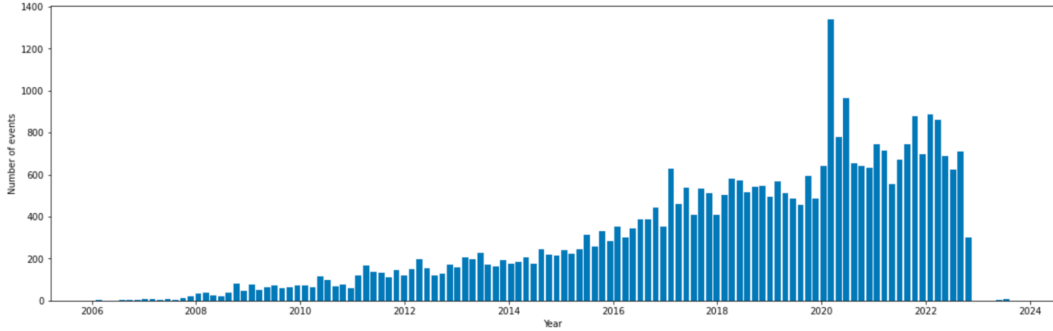

Figure 10: Distribution of the event date.

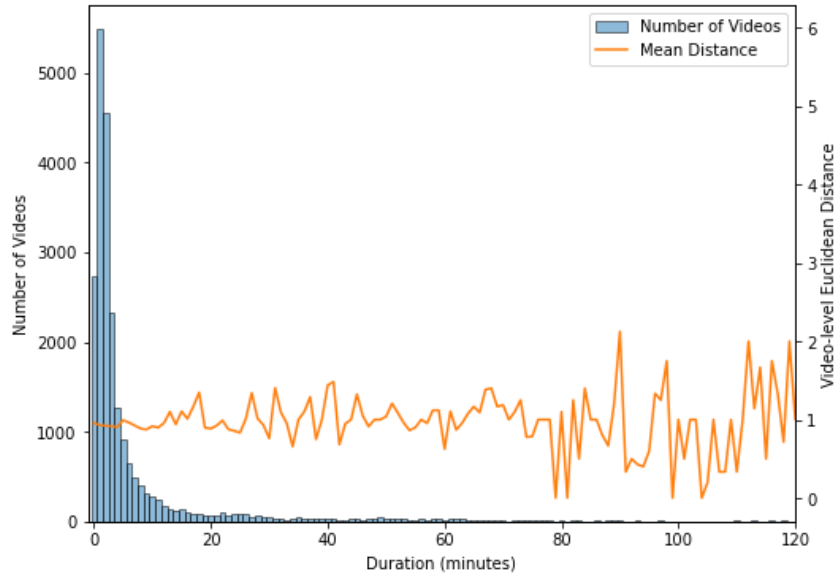

Figure 11: Number of videos and average video-level Euclidean distances in relation to video duration.

## 605 E Examples of Predicted Timelines

606 we present two examples of timelines predicted by our Tri-Transformer model in Table 4 and 5. The  
 607 videos that have been assigned to incorrect nodes are highlighted for clarity.

## 608 F Societal Impacts

609 We expect that the proposed benchmark dataset and methods will facilitate future advancements in  
 610 video timeline modeling. On the positive side, it offers a helpful tool for understanding and navigating  
 611 large volumes of news video data, enabling more efficient news consumption and ensuring a more  
 612 comprehensive understanding of events.

613 **One the negative side, the crawled timelines might not always reflect absolute precision. They might**  
 614 **be mistakenly used as evidence in some situations. This highlights the importance of using and**  
 615 **interpreting these timelines carefully. In addition, while we have taken steps to diversify our data**  
 616 **sources, news content can inherently carry biases based on various factors. We acknowledge this**  
 617 **challenge and emphasize the future need for more diverse data sourcing to capture a broad spectrum**  
 618 **of perspectives and reduce inherent biases. Also, there could be potential misuse if the technology**  
 619 **were applied unethically. Specifically, the construction of timelines could be manipulated to present**

| #ground truth nodes = 8, #predicted nodes = 29                                                                                                                       |                                                                                                                                                                                                                                                                                                                                                                                                                                                                                                                                                                                                                                                                                                                                                                                                                                                                                                                                                                                                                                                       |                                                                                                                                                                                                                                                                                                                                                                                                                                                                                                                                                                                                                                                                                                                                                                                                                                                                                                                                                                                                                                                       |
|----------------------------------------------------------------------------------------------------------------------------------------------------------------------|-------------------------------------------------------------------------------------------------------------------------------------------------------------------------------------------------------------------------------------------------------------------------------------------------------------------------------------------------------------------------------------------------------------------------------------------------------------------------------------------------------------------------------------------------------------------------------------------------------------------------------------------------------------------------------------------------------------------------------------------------------------------------------------------------------------------------------------------------------------------------------------------------------------------------------------------------------------------------------------------------------------------------------------------------------|-------------------------------------------------------------------------------------------------------------------------------------------------------------------------------------------------------------------------------------------------------------------------------------------------------------------------------------------------------------------------------------------------------------------------------------------------------------------------------------------------------------------------------------------------------------------------------------------------------------------------------------------------------------------------------------------------------------------------------------------------------------------------------------------------------------------------------------------------------------------------------------------------------------------------------------------------------------------------------------------------------------------------------------------------------|
| node-level precision/recall = 100.0%/100.0%, video-level Hamming distance = 0.103, video-level Euclidean distance = 0.103, video pairwise agreement accuracy = 96.6% |                                                                                                                                                                                                                                                                                                                                                                                                                                                                                                                                                                                                                                                                                                                                                                                                                                                                                                                                                                                                                                                       |                                                                                                                                                                                                                                                                                                                                                                                                                                                                                                                                                                                                                                                                                                                                                                                                                                                                                                                                                                                                                                                       |
| Node ID                                                                                                                                                              | Ground truth videos (titles)                                                                                                                                                                                                                                                                                                                                                                                                                                                                                                                                                                                                                                                                                                                                                                                                                                                                                                                                                                                                                          | Predicted videos (titles)                                                                                                                                                                                                                                                                                                                                                                                                                                                                                                                                                                                                                                                                                                                                                                                                                                                                                                                                                                                                                             |
| 1                                                                                                                                                                    | <p>TT_AWx7dglj "China Rocket Launches, Spacewalk Next"</p> <p>YJmrvQZnY0 "China Launches Its Third Manned Space Mission"</p>                                                                                                                                                                                                                                                                                                                                                                                                                                                                                                                                                                                                                                                                                                                                                                                                                                                                                                                          | <p>TT_AWx7dglj "China Rocket Launches, Spacewalk Next"</p> <p>YJmrvQZnY0 "China Launches Its Third Manned Space Mission"</p>                                                                                                                                                                                                                                                                                                                                                                                                                                                                                                                                                                                                                                                                                                                                                                                                                                                                                                                          |
| 2                                                                                                                                                                    | <p>UclL9xXpOYIE "LIET OFF: China launches space module rocket Tiangong 1"</p> <p>8ZK8KjHPLV9c "China launches first module for space station"</p> <p>2C0RKMWz88 "China launches first stage of space station plan"</p>                                                                                                                                                                                                                                                                                                                                                                                                                                                                                                                                                                                                                                                                                                                                                                                                                                | <p>UclL9xXpOYIE "LIET OFF: China launches space module rocket Tiangong 1"</p> <p>8ZK8KjHPLV9c "China launches first module for space station"</p> <p>2C0RKMWz88 "China launches first stage of space station plan"</p>                                                                                                                                                                                                                                                                                                                                                                                                                                                                                                                                                                                                                                                                                                                                                                                                                                |
| 3                                                                                                                                                                    | <p>MAX8UjCmScE "SPACE MISSION: China's Shenzhou-8 carries out first docking"</p> <p>1JZJGSHMID4 "Success as China passes its first space docking test"</p>                                                                                                                                                                                                                                                                                                                                                                                                                                                                                                                                                                                                                                                                                                                                                                                                                                                                                            | <p>MAX8UjCmScE "SPACE MISSION: China's Shenzhou-8 carries out first docking"</p> <p>1JZJGSHMID4 "Success as China passes its first space docking test"</p>                                                                                                                                                                                                                                                                                                                                                                                                                                                                                                                                                                                                                                                                                                                                                                                                                                                                                            |
| 4                                                                                                                                                                    | <p>3A6pvG676aM "China Lands Spacecraft on Moon"</p> <p>E-XYROWGEZAM "China's Chang'e3 unmanned spacecraft lands on the moon"</p> <p>6XadH_C3aGfGw "State TV in China broadcasts Moon landing"</p> <p>6GHhKiaL0 "China lands rover on the moon"</p> <p>PGrT1_jp1H0 "Chinese lunar rover lands on moon"</p> <p>RodztOlgZW0 "China launches Tiangong-2 space lab"</p> <p>euBf19S-ZE "China successfully launches 2nd space laboratory Tiangong-2"</p> <p>6oRZM3HPE1 "China successfully launches Tiangong-2 space lab"</p> <p>1Dy9RHANVmw6E "The launch of Tiangong-2 space lab"</p> <p>1stYgsn19Zs "China, lanciato in orbita il laboratorio spaziale Tiangong-2"</p> <p>kQlLjvIXEe "Chinese probe Chang'e 4 lands on far side of moon"</p> <p>AZAXKKN-7Uk "China's Chang'e-4 lands on moon's far side"</p> <p>WpzzHjVgROH "China lands Chang'e-4 space probe on the far side of the moon"</p> <p>6pYqF8B3XIE "Chang'e-4 Probe Takes Panoramic Photos on Moon's Far Side"</p> <p>6ET1G6pWAXU "Chang'e-4 Probe Takes First Photo of Moon's Far Side"</p> | <p>3A6pvG676aM "China Lands Spacecraft on Moon"</p> <p>E-XYROWGEZAM "China's Chang'e3 unmanned spacecraft lands on the moon"</p> <p>6XadH_C3aGfGw "State TV in China broadcasts Moon landing"</p> <p>6GHhKiaL0 "China lands rover on the moon"</p> <p>PGrT1_jp1H0 "Chinese lunar rover lands on moon"</p> <p>RodztOlgZW0 "China launches Tiangong-2 space lab"</p> <p>euBf19S-ZE "China successfully launches 2nd space laboratory Tiangong-2"</p> <p>6oRZM3HPE1 "China successfully launches Tiangong-2 space lab"</p> <p>1Dy9RHANVmw6E "The launch of Tiangong-2 space lab"</p> <p>1stYgsn19Zs "China, lanciato in orbita il laboratorio spaziale Tiangong-2"</p> <p>kQlLjvIXEe "Chinese probe Chang'e 4 lands on far side of moon"</p> <p>AZAXKKN-7Uk "China's Chang'e-4 lands on moon's far side"</p> <p>WpzzHjVgROH "China lands Chang'e-4 space probe on the far side of the moon"</p> <p>6pYqF8B3XIE "Chang'e-4 Probe Takes Panoramic Photos on Moon's Far Side"</p> <p>6ET1G6pWAXU "Chang'e-4 Probe Takes First Photo of Moon's Far Side"</p> |
| 5                                                                                                                                                                    | <p>J7M-nEJnrk "China puts final satellite for Beidou into orbit"</p> <p>JCa9UPHMaWE "China launches 100% domestically produced final satellite to complete Beidou system"</p>                                                                                                                                                                                                                                                                                                                                                                                                                                                                                                                                                                                                                                                                                                                                                                                                                                                                         | <p>J7M-nEJnrk "China puts final satellite for Beidou into orbit"</p> <p>JCa9UPHMaWE "China launches 100% domestically produced final satellite to complete Beidou system"</p> <p>WSKcHnZ/LM "China launches unmanned probe in first independent Mars mission"</p> <p>w1w1t00Nsc "China launches its first unmanned mission to Mars"</p>                                                                                                                                                                                                                                                                                                                                                                                                                                                                                                                                                                                                                                                                                                               |
| 6                                                                                                                                                                    | <p>W5KCBnZ-LM "China launches unmanned probe in first independent Mars mission"</p> <p>W1w1t00Nsc "China launches its first unmanned mission to Mars"</p> <p>CmzTnxBvo "Tianwen 1: China launches first independent mission to Mars"</p> <p>CqzB00HtVc "Beijing launches unmanned interplanetary mission to Mars"</p> <p>0OCpNIGrEQ "China launches unnamed Mars probe"</p>                                                                                                                                                                                                                                                                                                                                                                                                                                                                                                                                                                                                                                                                           | <p>W5KCBnZ-LM "China launches unmanned probe in first independent Mars mission"</p> <p>W1w1t00Nsc "China launches its first unmanned mission to Mars"</p> <p>CmzTnxBvo "Tianwen 1: China launches first independent mission to Mars"</p> <p>CqzB00HtVc "Beijing launches unmanned interplanetary mission to Mars"</p> <p>0OCpNIGrEQ "China launches unnamed Mars probe"</p>                                                                                                                                                                                                                                                                                                                                                                                                                                                                                                                                                                                                                                                                           |
| 7                                                                                                                                                                    | <p>W5KCBnZ-LM "China launches unmanned probe in first independent Mars mission"</p> <p>W1w1t00Nsc "China launches its first unmanned mission to Mars"</p> <p>CmzTnxBvo "Tianwen 1: China launches first independent mission to Mars"</p> <p>CqzB00HtVc "Beijing launches unmanned interplanetary mission to Mars"</p> <p>0OCpNIGrEQ "China launches unnamed Mars probe"</p>                                                                                                                                                                                                                                                                                                                                                                                                                                                                                                                                                                                                                                                                           | <p>W5KCBnZ-LM "China launches unmanned probe in first independent Mars mission"</p> <p>W1w1t00Nsc "China launches its first unmanned mission to Mars"</p> <p>CmzTnxBvo "Tianwen 1: China launches first independent mission to Mars"</p> <p>CqzB00HtVc "Beijing launches unmanned interplanetary mission to Mars"</p> <p>0OCpNIGrEQ "China launches unnamed Mars probe"</p>                                                                                                                                                                                                                                                                                                                                                                                                                                                                                                                                                                                                                                                                           |
| 8                                                                                                                                                                    | <p>W5KCBnZ-LM "China launches unmanned probe in first independent Mars mission"</p> <p>W1w1t00Nsc "China launches its first unmanned mission to Mars"</p> <p>CmzTnxBvo "Tianwen 1: China launches first independent mission to Mars"</p> <p>CqzB00HtVc "Beijing launches unmanned interplanetary mission to Mars"</p> <p>0OCpNIGrEQ "China launches unnamed Mars probe"</p>                                                                                                                                                                                                                                                                                                                                                                                                                                                                                                                                                                                                                                                                           | <p>W5KCBnZ-LM "China launches unmanned probe in first independent Mars mission"</p> <p>W1w1t00Nsc "China launches its first unmanned mission to Mars"</p> <p>CmzTnxBvo "Tianwen 1: China launches first independent mission to Mars"</p> <p>CqzB00HtVc "Beijing launches unmanned interplanetary mission to Mars"</p> <p>0OCpNIGrEQ "China launches unnamed Mars probe"</p>                                                                                                                                                                                                                                                                                                                                                                                                                                                                                                                                                                                                                                                                           |

Table 4: A timeline of "Major milestones in Chinese space exploration".

| #ground truth nodes = 10, #predicted nodes = 12, #vidoes = 40                                                                                                      |                                                                                                                                                                                                                                                                                                                                                                                                                                                                                                 |                                                                                                                                                                                                                                                                                                                                                                                                                                                                                                 |
|--------------------------------------------------------------------------------------------------------------------------------------------------------------------|-------------------------------------------------------------------------------------------------------------------------------------------------------------------------------------------------------------------------------------------------------------------------------------------------------------------------------------------------------------------------------------------------------------------------------------------------------------------------------------------------|-------------------------------------------------------------------------------------------------------------------------------------------------------------------------------------------------------------------------------------------------------------------------------------------------------------------------------------------------------------------------------------------------------------------------------------------------------------------------------------------------|
| node-level precision/recall = 56.3%/70.0%, video-level Hamming distance = 0.525, video-level Euclidean distance = 0.575, video pairwise agreement accuracy = 91.2% |                                                                                                                                                                                                                                                                                                                                                                                                                                                                                                 |                                                                                                                                                                                                                                                                                                                                                                                                                                                                                                 |
| Node ID                                                                                                                                                            | Ground truth videos (titles)                                                                                                                                                                                                                                                                                                                                                                                                                                                                    | Predicted videos (titles)                                                                                                                                                                                                                                                                                                                                                                                                                                                                       |
| 1                                                                                                                                                                  | <p>aUs-BkqMLAM "Schools Respond To U.S. Department of Ed Letter on Transgender Students"</p> <p>zZpYARsSPRI "Local reaction to school transgender guidelines"</p> <p>w7jeru0R0PM "Local school divisions, and the public, react to transgender announcement"</p> <p>1ghWbW4DKwz "Protections pulled from transgender school restrooms"</p>                                                                                                                                                      | <p>aUs-BkqMLAM "Schools Respond To U.S. Department of Ed Letter on Transgender Students"</p> <p>zZpYARsSPRI "Local reaction to school transgender guidelines"</p> <p>w7jeru0R0PM "Local school divisions, and the public, react to transgender announcement"</p> <p>1ghWbW4DKwz "Protections pulled from transgender school restrooms"</p>                                                                                                                                                      |
| 2                                                                                                                                                                  | <p>TNm3hNtSzy "How scrapping transgender bathroom guidelines impacts schools"</p> <p>KPFx_FkEX2s "Rights and Recourse, 26 February 2017"</p> <p>zZwBwMac16U "CI Bitesize: Trans bathroom guidance revoked"</p>                                                                                                                                                                                                                                                                                  | <p>TNm3hNtSzy "How scrapping transgender bathroom guidelines impacts schools"</p> <p>KPFx_FkEX2s "Rights and Recourse, 26 February 2017"</p> <p>zZwBwMac16U "CI Bitesize: Trans bathroom guidance revoked"</p>                                                                                                                                                                                                                                                                                  |
| 3                                                                                                                                                                  | <p>X9qHjngRk "Vanderbilt kicker Sarah Fuller becomes first woman to score in a Power 5 game"</p> <p>880Q849PAX "Sarah Fuller Becomes First Female Player To Kick Extra Point"</p> <p>6Ca1F7nY6F8 "Women's Football Highlight Show"</p>                                                                                                                                                                                                                                                          | <p>X9qHjngRk "Vanderbilt kicker Sarah Fuller becomes first woman to score in a Power 5 game"</p> <p>880Q849PAX "Sarah Fuller Becomes First Female Player To Kick Extra Point"</p> <p>6Ca1F7nY6F8 "Women's Football Highlight Show"</p>                                                                                                                                                                                                                                                          |
| 4                                                                                                                                                                  | <p>8kadE06p08 "President Biden Delivers Remarks and Signs Executive Orders"</p> <p>8XMSJ3H8D8A "President Joe Biden signs executive orders as 1st official act"</p> <p>1XV9Y0TzAT "Biden delivers remarks, signs exec order on racial equity agenda"</p> <p>1XUSFFeWhM "President Joe Biden signs his first executive orders"</p> <p>es_SMG803d "Unpacking Biden's first Executive Orders"</p>                                                                                                  | <p>8kadE06p08 "President Biden Delivers Remarks and Signs Executive Orders"</p> <p>8XMSJ3H8D8A "President Joe Biden signs executive orders as 1st official act"</p> <p>1XV9Y0TzAT "Biden delivers remarks, signs exec order on racial equity agenda"</p> <p>1XUSFFeWhM "President Joe Biden signs his first executive orders"</p> <p>es_SMG803d "Unpacking Biden's first Executive Orders"</p>                                                                                                  |
| 5                                                                                                                                                                  | <p>IDdD7vAsLs "Presidential address: Watch Biden's full speech from March 11, 2021"</p> <p>6ValdsYekK "Education announcement - March 12, 2021"</p>                                                                                                                                                                                                                                                                                                                                             | <p>IDdD7vAsLs "Presidential address: Watch Biden's full speech from March 11, 2021"</p> <p>6ValdsYekK "Education announcement - March 12, 2021"</p>                                                                                                                                                                                                                                                                                                                                             |
| 6                                                                                                                                                                  | <p>3e9Hc2a0b8w "Supreme Court rules in favor of transgender student Gavin Grimm"</p> <p>ZYvYB7kAfPE "Supreme Court refuses case for transgender bathroom rule"</p>                                                                                                                                                                                                                                                                                                                              | <p>3e9Hc2a0b8w "Supreme Court rules in favor of transgender student Gavin Grimm"</p> <p>ZYvYB7kAfPE "Supreme Court refuses case for transgender bathroom rule"</p>                                                                                                                                                                                                                                                                                                                              |
| 7                                                                                                                                                                  | <p>8GwG2q0pH1Y "U.S. women soccer players reach \$24 million settlement in fight for equal pay"</p> <p>HCS8Jy1R0H1 "U.S. Soccer and women's national team players settle equal pay lawsuit for \$24 million"</p> <p>ZMAp6HtKqU "US women soccer players settle equal pay suit for \$24M"</p> <p>EAZB29f8w8k "US women's Soccer players reach landmark \$24 million settlement with Soccer Federation"</p> <p>3-vXNT1j1U "A win for everyone: U.S. women's soccer settles equal pay dispute"</p> | <p>8GwG2q0pH1Y "U.S. women soccer players reach \$24 million settlement in fight for equal pay"</p> <p>HCS8Jy1R0H1 "U.S. Soccer and women's national team players settle equal pay lawsuit for \$24 million"</p> <p>ZMAp6HtKqU "US women soccer players settle equal pay suit for \$24M"</p> <p>EAZB29f8w8k "US women's Soccer players reach landmark \$24 million settlement with Soccer Federation"</p> <p>3-vXNT1j1U "A win for everyone: U.S. women's soccer settles equal pay dispute"</p> |
| 8                                                                                                                                                                  | <p>kAnb9vtd4dA "Lia Thomas Becomes 1st Transgender Athlete To Win NCAA Championship"</p> <p>1HXC82E1Zg "Reaction to trans swimmer Lia Thomas' NCAA Championship"</p> <p>HLCN64HSyU "Making Waves: Transgender Swimmer Lia Thomas' NCAA Win Sparks Public Protest"</p> <p>15pCVLIDNk "Lia Thomas competes in Division"</p> <p>ZJ76yicEaE "WATCH: Lia Thomas Swims 4:33.82 in 500 Free Prelims at NCAA Championships"</p>                                                                         | <p>kAnb9vtd4dA "Lia Thomas Becomes 1st Transgender Athlete To Win NCAA Championship"</p> <p>1HXC82E1Zg "Reaction to trans swimmer Lia Thomas' NCAA Championship"</p> <p>HLCN64HSyU "Making Waves: Transgender Swimmer Lia Thomas' NCAA Win Sparks Public Protest"</p> <p>15pCVLIDNk "Lia Thomas competes in Division"</p> <p>ZJ76yicEaE "WATCH: Lia Thomas Swims 4:33.82 in 500 Free Prelims at NCAA Championships"</p>                                                                         |
| 9                                                                                                                                                                  | <p>2823WYD9R8z "2021-22 Women's Basketball Season Recap"</p> <p>88sZkLAgE1 "Locked on Women's Basketball, March 24, 2022: 68 to the Sweet 16!"</p> <p>AV0yBB0pml "NCAA Women's Basketball Tournament comes to Spokane and other top stories at 8 a.m."</p> <p>4AnR3KH0K8 "Women's Basketball Weekly Update (03.29.2022)"</p> <p>K6Z7U5HcUk "NAU Women's Basketball Championship Update"</p>                                                                                                     | <p>2823WYD9R8z "2021-22 Women's Basketball Season Recap"</p> <p>88sZkLAgE1 "Locked on Women's Basketball, March 24, 2022: 68 to the Sweet 16!"</p> <p>AV0yBB0pml "NCAA Women's Basketball Tournament comes to Spokane and other top stories at 8 a.m."</p> <p>4AnR3KH0K8 "Women's Basketball Weekly Update (03.29.2022)"</p> <p>K6Z7U5HcUk "NAU Women's Basketball Championship Update"</p>                                                                                                     |
| 10                                                                                                                                                                 | <p>XHEAZL0BYw "UConn vs. South Carolina I Full Game Highlights"</p> <p>tdDT90u11A "South Carolina vs. UConn - Women's NCAA tournament championship highlights"</p> <p>107855v1p4 "South Carolina vs. UConn: 2022 NCAA women's national championship"</p> <p>z0aAp10m1c "Press Conference: South Carolina vs. UConn Postgame - 2022 NCAA Tournament"</p> <p>1xPz29JZV "South Carolina women's basketball national championship celebration"</p>                                                  | <p>XHEAZL0BYw "UConn vs. South Carolina I Full Game Highlights"</p> <p>tdDT90u11A "South Carolina vs. UConn - Women's NCAA tournament championship highlights"</p> <p>107855v1p4 "South Carolina vs. UConn: 2022 NCAA women's national championship"</p> <p>z0aAp10m1c "Press Conference: South Carolina vs. UConn Postgame - 2022 NCAA Tournament"</p> <p>1xPz29JZV "South Carolina women's basketball national championship celebration"</p>                                                  |
| 11                                                                                                                                                                 | <p>tdDT90u11A "South Carolina vs. UConn - Women's NCAA tournament championship highlights"</p> <p>107855v1p4 "South Carolina vs. UConn: 2022 NCAA women's national championship"</p> <p>z0aAp10m1c "Press Conference: South Carolina vs. UConn Postgame - 2022 NCAA Tournament"</p> <p>1xPz29JZV "South Carolina women's basketball national championship celebration"</p>                                                                                                                      | <p>tdDT90u11A "South Carolina vs. UConn - Women's NCAA tournament championship highlights"</p> <p>107855v1p4 "South Carolina vs. UConn: 2022 NCAA women's national championship"</p> <p>z0aAp10m1c "Press Conference: South Carolina vs. UConn Postgame - 2022 NCAA Tournament"</p> <p>1xPz29JZV "South Carolina women's basketball national championship celebration"</p>                                                                                                                      |
| 12                                                                                                                                                                 | <p>tdDT90u11A "South Carolina vs. UConn - Women's NCAA tournament championship highlights"</p> <p>107855v1p4 "South Carolina vs. UConn: 2022 NCAA women's national championship"</p> <p>z0aAp10m1c "Press Conference: South Carolina vs. UConn Postgame - 2022 NCAA Tournament"</p> <p>1xPz29JZV "South Carolina women's basketball national championship celebration"</p>                                                                                                                      | <p>tdDT90u11A "South Carolina vs. UConn - Women's NCAA tournament championship highlights"</p> <p>107855v1p4 "South Carolina vs. UConn: 2022 NCAA women's national championship"</p> <p>z0aAp10m1c "Press Conference: South Carolina vs. UConn Postgame - 2022 NCAA Tournament"</p> <p>1xPz29JZV "South Carolina women's basketball national championship celebration"</p>                                                                                                                      |

Table 5: A timeline of "50 Years of Title IX: The Defining Moments of Women's Sports".

620 events in a way that supports a particular opinion, thereby distorting the truth. To alleviate this  
 621 potential concern, regular validation and fact-checking mechanisms can help ensure the constructed  
 622 timelines align with factual occurrences.

## 623 G Discussions on Future Directions

624 Here, we highlight several promising directions, including more principle exploration for problems  
 625 and methodologies, for future research in this field.

626 On one hand, more effective and principle methodologies are highly desired. First, as demonstrated  
 627 in the experiments, we can develop more effective strategies to leverage textual information during  
 628 training. Second, while our current method, as an exploratory work, treats the problem as a multi-class

629 classification problem, it would be more principle to consider the problem as a ranking problem and  
630 use differentiable ranking models. Third, our algorithms assign a set of videos simultaneously, which  
631 may result in different assignments for the same video if we add or delete a video in the set. It remains  
632 challenging to model video interactions while keeping the prediction of videos less dependent. This  
633 aspect presents a potential avenue for enhancement.

634 In addition, future research can also be made from a problem-oriented perspective. Given that our  
635 defined problem and evaluation standard concentrate solely on assigning input video sets to ordered  
636 nodes, one possible extension is to integrate the event summarization step with our defined problem  
637 to construct a timeline with both associated videos and event information. The event information can  
638 be in the form of text, key frames, *etc.* Although our YouTube-News-Timeline dataset can be used  
639 to evaluate the generated event text descriptions, the evaluation protocol and algorithms need to be  
640 dedicatedly redesigned. In addition, extending the single linear timeline to more complex relationship  
641 modeling, such as multiple timelines [\[Yu et al., 2021\]](#) and graphs, can be a promising future direction  
642 to enhance the understanding of news stories
